1

2

## **Establishment of *Wolbachia* strain *wAlbB* in Malaysian populations of**

3

## ***Aedes aegypti* for dengue control**

4

5

W. A. Nazni<sup>1\*</sup>, A. A. Hoffmann<sup>2\*</sup>, A. Noor Afizah<sup>1</sup>, Y. L. Cheong<sup>1</sup>, M. V. Mancini<sup>3</sup>, N.

6

Golding<sup>4</sup>, M. R. G. Kamarul<sup>1</sup>, A. K. M. Arif<sup>1</sup>, H. Thohir<sup>1</sup>, H. S. Nur Syamimi<sup>1</sup>, M. Z. Nur

7

Zatil Aqmar<sup>1</sup>, M. M. Nur Ruqqayah<sup>1</sup>, A. Siti Nor Syazwani<sup>1</sup>, A. Faiz<sup>1</sup>, M. N. F. R. Irfan<sup>1</sup>, S.

8

Rubaa<sup>1</sup>, N. Nuradila<sup>1</sup>, M. M. N. Nizam<sup>1</sup>, M. S. Mohamad Irwan<sup>1</sup>, N. M. Endersby-

9

Harshman<sup>2</sup>, V. L. White<sup>2</sup>, T. H. Ant<sup>3</sup>, C. Herd<sup>3</sup>, H. A. Hasnor<sup>5</sup>, R. Abu Bakars<sup>5</sup>, M. D.

10

Hapsah<sup>5</sup>, K. Khadijah<sup>6</sup>, D. Kamilan<sup>6</sup>, S. C. Lee<sup>6</sup>, M. Paid<sup>6</sup>, K. Fadzilah<sup>1</sup>, B. S. Gill<sup>1</sup>, H. L.

11

Lee<sup>1</sup>, S. P. Sinkins<sup>3</sup>

12

<sup>1</sup>Institute for Medical Research, Kuala Lumpur, Malaysia.

13

<sup>2</sup>University of Melbourne, Bio21 Institute and the School of BioSciences, Melbourne,

14

Australia.

15

<sup>3</sup>MRC-University of Glasgow Centre for Virus Research, Glasgow, UK.

16

<sup>4</sup>University of Melbourne, School of BioSciences, Melbourne, Australia.

17

<sup>5</sup>Institute for Health Behavioural Research (IPTK), Kuala Lumpur, Malaysia.

18

<sup>6</sup>Petaling District Health Office, Selangor, Malaysia.

19

\* These authors contributed equally to this work

20

## 21 **Abstract**

22 Dengue has enormous health impacts globally. A novel approach to decrease dengue incidence  
23 involves the introduction of *Wolbachia* endosymbionts that block dengue virus transmission  
24 into populations of the primary vector mosquito, *Aedes aegypti*. The *wMel* *Wolbachia* strain  
25 has previously been trialed in open releases of *Ae. aegypti*; however the *wAlbB* strain has been  
26 shown to maintain higher density than *wMel* at high larval rearing temperatures. Releases of  
27 *Ae. aegypti* mosquitoes carrying *wAlbB* were carried out in 6 diverse sites in greater Kuala  
28 Lumpur, Malaysia, with high endemic dengue transmission. The strain was successfully  
29 established and maintained at very high population frequency at some sites, or persisted with  
30 additional releases following fluctuations at other sites. Based on passive case monitoring,  
31 reduced human dengue incidence was observed in the release sites when compared to control  
32 sites. The *wAlbB* strain of *Wolbachia* provides a promising option as a tool for dengue control,  
33 particularly in very hot climates.  
34

35

## 36 **Introduction**

37 There are around 90 million symptomatic cases of dengue each year [1] with severe disease in  
38 around 1% of cases, including life-threatening haemorrhage or shock syndrome. Reducing  
39 abundance of the primary vector mosquito *Aedes aegypti* using insecticides and breeding site  
40 reduction remain the main strategies for dengue control, but are relatively ineffective. The  
41 introduction of *Wolbachia* endosymbionts into *Ae. aegypti* and demonstration of dengue  
42 transmission-blocking [2-6] has been followed by the use of the *wMel* strain (from *Drosophila*  
43 *melanogaster*) for ‘population replacement’, resulting in this strain reaching and maintaining a  
44 high and stable frequency in north Queensland [7-9], where there has been a near-cessation of  
45 imported dengue outbreaks [10].

46 *Wolbachia* replacement involves the induction of cytoplasmic incompatibility (CI), a  
47 reproductive manipulation imposing a pattern of crossing sterility that provides an advantage  
48 to *Wolbachia*-carrying females. CI enables rapid spread to high frequency in insect populations  
49 once a threshold frequency has been exceeded, depending on host fitness parameters and CI /  
50 maternal transmission rates [7, 11, 12]. Different *Wolbachia* strains vary considerably in their  
51 effects on *Ae. aegypti* fitness parameters [13-16], and thus their population invasion /  
52 maintenance capacity (indeed strain *wMelPop*, a higher-replicating variant of *wMel* with high  
53 fitness cost, was unable to maintain itself in *Ae. aegypti* populations [15]).

54 Recent reports suggested that *wMel* may show reduced density and cytoplasmic  
55 incompatibility when *Ae. aegypti* larvae are reared at high temperatures [13-14, 16], which also  
56 matched temperatures previously recorded in wild *Ae. aegypti* larval sites elsewhere [17];  
57 larvae in containers exposed to sunlight for part of the day would experience even higher  
58 temperatures than the recorded ambient air temperatures. However, *wAlbB* proved to be much  
59 less susceptible to the effects of similar high rearing temperatures [14, 16]. This suggests that  
60 *wAlbB* might be well suited for population replacement in hot environments, given its ability  
61 to effectively block transmission of dengue and other arboviruses [5]; *wAlbB* has not  
62 previously been deployed in this way.

63 The primary aim of these field trials was to assess whether *wAlbB* can be established /  
64 maintained at high frequency in urban *Ae. aegypti* in greater Kuala Lumpur, Malaysia, and  
65 what conditions are most conducive to establishment. In Malaysia over 100,000 dengue cases  
66 were reported in 2016, with an annual cost estimated at \$175 million [18, 19]. Extended periods  
67 with daily peak temperatures exceeding 36°C occur in Kuala Lumpur. In light of *Wolbachia*  
68 strain difference in temperature responses, which may impact both the *Wolbachia* population

69 frequency and the efficacy of dengue blocking in wild populations, this hot tropical  
70 environment provides an opportunity to test whether *wAlbB*-carrying *Ae. aegypti* with different  
71 effects on host fitness components to *wMel* [14, 16] can invade an area where dengue is  
72 endemic. Information was also collected on dengue incidence in release areas and in matched  
73 control sites.

74

## 75 **Results**

### 76 *Site selection*

77 Intervention sites with persistent occurrence of dengue over the previous four years were  
78 selected (Table 1), in accordance with a WHO-recommended criterion for dengue intervention  
79 trial design [20]. Four primary intervention sites were chosen in Selangor State to represent  
80 different building types in order to explore *Wolbachia wAlbB* spread and maintenance  
81 dynamics in different settings (Table 1; Fig. S1): high-rise (18 floor) apartment buildings, 4/5-  
82 floor flats, 5 floor combined shop and flat buildings, landed terraces, and landed houses (Fig.  
83 1). For two of the sites, releases were also conducted at adjacent smaller secondary sites with  
84 different building type. Where possible, boundaries to mosquito movement on at least a portion  
85 of the perimeter were incorporated in order to minimize immigration from surrounding areas -  
86 highways of six lanes and above / rivers / grassland and park areas [21]. Estimates of *Aedes*  
87 species composition and population size over time were obtained using ovitraps (Figs. 2, S2,  
88 S3). *Ae. albopictus* is present at all the sites (Fig. S3) (the latter is to be targeted subsequently  
89 for replacement releases using dengue-blocking strains [22, 23]. Community engagement is a  
90 very important component of *Wolbachia* transmission-blocking programs, given that biting  
91 female mosquitoes must be released into the environment; community consent and strong  
92 support for releases was obtained in all sites (see Materials and Methods).

### 93 *Releases*

94 In order to obtain a fit, locally adapted and competitive *Ae. aegypti wAlbB* line for release [16],  
95 four generations of backcrossing to field-collected local material were carried out. An  
96 important factor in relative fitness is insecticide resistance, given increasing levels of resistance  
97 [24] (particularly to pyrethroids). Susceptibility was compared between F1 adults from field-  
98 collected individuals and the release line using bioassays and found to be similar for  
99 pyrethroids, as well as to the organophosphates fenitrothion and pirimiphos (Fig. S4). The  
100 backcrossed *Ae. aegypti wAlbB* line was mass reared in preparation for releases. Wing  
101 measurements taken from mass-reared adults were in the range expected to produce fit,  
102 competitive release mosquitoes based on studies with Australian *Ae. aegypti* [25, 26] (average  
103 (SD) for males 2.28 (0.10) mm, females 2.96 (0.11) mm).

104 *Wolbachia* invasion depends on it exceeding a frequency dictated by fitness effects,  
105 incompatibility and maternal transmission; this was used to estimate required release rate with  
106 the ovitrap index (traps positive for *Ae. aegypti* divided by total traps per site) providing an  
107 estimate of population size [7]. Adult mosquitoes were released weekly in the morning on a  
108 pre-determined grid (with one cup of 50 mosquitoes released on a grid on ground / second  
109 floors in Section 7 and on every third floor in Mentari Court). After around 4 weeks of releases,  
110 *Wolbachia* frequency monitoring commenced using ovitraps, with the resulting eggs returned  
111 to the laboratory, raised to adults and a selection of the *Ae. aegypti* samples from each trap used  
112 for *Wolbachia* qPCR analysis [27]. In one of the sites, Section 7 Commercial Centre, eggs  
113 rather than adults were released: covered containers to which approximately 200 eggs in 400  
114 mL water with larval food had been added (Fig. S5) were left out for 2 weeks for the adults to  
115 emerge on site.

## 116 *Changes in Wolbachia and mosquito numbers*

117 *Wolbachia* frequency rose rapidly to over 80% at all sites (Fig. 3). Following the cessation of  
118 releases, the *Wolbachia* frequency has remained stable and high (98% 12 months after releases  
119 ceased) in Mentari Court. At the AU2 and Section 7 Flat sites, the frequency exceeded 95%  
120 but subsequently fluctuated following cessation of releases. Immigration of *Wolbachia*-free  
121 mosquitoes from surrounding untreated areas can reduce *Wolbachia* frequency where there is  
122 a low population size and relatively weak boundary barriers to mosquito population movement  
123 [21] which occurred at these locations; also in Section 7 Flats a 29-hectare construction site  
124 ('i-City'), 159 m from the release zone, likely provided larval breeding sites and a source of  
125 wildtype *Wolbachia*-free migrants. Therefore, it was decided to resume releases at a lower  
126 release rate, whereupon *Wolbachia* frequencies rapidly rose again (Fig. 3).

127 Population size monitoring before and during the releases (Fig. 2) also confirmed that there  
128 were no major population spikes associated with the release phase in the sites; this is expected  
129 given that mating between released males and wild females result in embryo death due to  
130 cytoplasmic incompatibility, balancing the population-increasing effects of female releases. In  
131 fact, in some sites post-*Wolbachia* establishment *Ae. aegypti* population density appeared to be  
132 lower than previously recorded based on ovitrap index (Fig. 2). More data are needed to support  
133 this observation, but the trend is consistent with a population suppressing effect caused by the  
134 fitness cost associated with *wAlbB*, particularly with respect to a steadily increasing mortality  
135 over time of desiccated eggs when added to water for hatching [16]. Areas with a higher  
136 proportion of temporary rather than permanent breeding sites, where periodic flushing of  
137 quiescent eggs is important, are predicted to experience a higher level of population  
138 suppression following invasion. Post-release community surveys revealed that a majority of  
139 residents did not notice any increase in mosquito biting (Fig. S6).

## 140 *Dengue incidence*

141 Human dengue incidence from 2013-2019 were compared between release sites and matched  
142 control sites, based on data recorded by the Malaysian National Dengue Surveillance System.  
143 Control sites were selected for comparable dengue incidence to the release sites in the period  
144 from 2013 to the start of releases (Table 1); within the same District as the release site where  
145 possible, to ensure similar non-*Wolbachia* dengue control activities (except that a wider area  
146 was used for some of the Mentari Court sites, in order to ensure that some sites with similar or  
147 higher incidence compared to the release site could be identified); and building type of the  
148 'primary' site in each location, to meet similar mosquito and human population characteristics  
149 (size, movement, etc.) (Table 1). Dengue incidence was reduced following releases in all  
150 intervention sites (Figs. 4, S7). A Bayesian time series model [28-30] produced an estimate of  
151 dengue case reduction of 40.3% over all intervention sites (95% credible interval 5.06 – 64.59)  
152 (Fig. S8), with posterior probability of a reduction in intervention sites post-release of 0.985.

153 In the 18-floor apartment buildings of Mentari Court, prior to *Wolbachia* releases dengue cases  
154 were high since at least 2013 (Fig. 4) despite intensive control efforts involving repeated rounds  
155 of clean-up 'source reduction' coupled with community engagement, and repeated thermal  
156 fogging (Fig. 5), none of which proved effective in reducing dengue incidence. The  
157 introduction of *Wolbachia wAlbB* has, in contrast, reduced dengue cases to a point where  
158 insecticide fogging by the local health authorities was no longer considered necessary (Figs.  
159 4,5).

160

## 161 **Discussion**

162 The results indicate the successful introduction of *wAlbB Wolbachia* into release sites in  
163 Selangor. The frequency of *wAlbB* has remained high at two sites following invasion (Mentari  
164 Court, Commercial Centre) and the frequency at Mentari Court is currently still >90%, two  
165 years after releases were terminated. An important consideration with respect to achieving

166 stable high *Wolbachia* frequency is *Ae. aegypti* population size versus movement; in Mentari  
167 Court there is a relatively high population per unit ground area compared to the Section 7 zones,  
168 given *Ae. aegypti* were collected in ovitraps all the way up to the 18<sup>th</sup> floor. This will need to  
169 be incorporated into the design of wider strategy roll-out; for example buffer release zones  
170 should be incorporated around the perimeter of high-transmission localities that have small  
171 area, low *Ae. aegypti* population size or no clear natural boundaries to *Ae. aegypti* movement.  
172 The importance of area size in successful invasions has previously been recognized for wMel  
173 introductions in Cairns, Australia, where *Wolbachia* failed to establish at one small site  
174 following releases despite successfully establishing at larger nearby release sites [21].

175 The successful deployment of egg containers for release at the Commercial Centre site has  
176 proven to be logistically much less laborious than adult releases and will also greatly facilitate  
177 wider roll-out. This reflects the fact that eggs produced in the laboratory can be easily cut into  
178 strips and transported to the field, where water and food can be added to containers. In contrast,  
179 adult releases require transfer of larvae to release containers where they can pupate and eclose,  
180 which requires additional handling of the immature stages by laboratory personnel. Egg  
181 containers were previously used in releases of wMel in Townsville, Australia, where they also  
182 proved successful [10]. However, if density-dependent processes occur in such containers it  
183 could slow the rate of *Wolbachia* invasion [31].

184 The dengue incidence data points to a reduction in incidence at release sites following  
185 *Wolbachia* introductions when compared to control sites. Reduction to zero cases would not  
186 be an expected outcome even if the strategy is 100% efficient, given that *Ae. aegypti* bite during  
187 the daytime and thus dengue can be acquired outside of the place of residence (for example at  
188 work or school) during the day, and also given that *Ae. albopictus* is abundant at these sites  
189 (Fig. S3) and has yet to be targeted using *Wolbachia* replacement. Both factors make the effect  
190 of the intervention more difficult to detect with passive surveillance as was used here; only the  
191 effects of *Wolbachia* on local transmission of dengue by *Ae. aegypti* in the release zone are  
192 being detected in these comparisons. Nevertheless, clear differences in incidence between  
193 intervention and control sites were observed. The overall effect size produced by the Bayesian  
194 model of 40% dengue case reduction is thus a conservative estimate; active surveillance using  
195 seroconversion of naïve pre-school children would provide a more accurate measure of the  
196 effect of the releases on local transmission, given a much higher proportion of locally acquired  
197 cases are expected in this cohort [20], but this was beyond the budget and scope of the current  
198 study.

199 In summary, the results clearly demonstrate the capacity of *Wolbachia* strain wAlbB in urban  
200 *Ae. aegypti* to become established and maintain itself at high frequency in *Ae. aegypti*  
201 populations. Releases in a larger number of diverse intervention sites are now being undertaken  
202 in conjunction with the Malaysian Ministry of Health to comprehensively evaluate wAlbB  
203 effects on dengue transmission in different settings. The cessation of fogging in the release  
204 zones due to reduced dengue cases also points to the economic sustainability of the approach,  
205 given that large sums are spent annually on insecticides for dengue control [19]. Longer periods  
206 of dengue monitoring post-release will further increase the accuracy of the estimated effect  
207 size of the intervention on dengue incidence, and as more areas become *Wolbachia*-positive  
208 the proportion of imported cases will also fall. The establishment of wAlbB under high  
209 temperature conditions as reported here points to it being a promising option for deployment  
210 in very hot tropical climates. Transmission blocking for other viruses including Zika,  
211 chikungunya, and yellow fever could also be achieved using *Wolbachia* [4, 32, 33].

212

## 213 **Materials and Methods**

### 214 *Backcrossing and mass rearing*

215 To maximize the fitness and competitiveness of the mosquitoes to be released, backcrossing to  
216 freshly field-collected material was carried out. A total of 100 3-5 day-old females from the  
217 *wAlbB Wolbachia* line [16] were placed into 24 x 24 x 24 cm cages, together with the same  
218 number of 3-5 day-old males per cage of F1 / F2 mosquitoes from Shah Alam. After being left  
219 for mating for 2-3 days, they were allowed to blood feed on mice (Malaysian National Institute  
220 of Health approval number NMRR-16-297-28898). F1 females were then crossed to males of  
221 the field strain, again F1 / F2, to obtain the backcross one (B1) generation. The process was  
222 repeated twice to obtain generation B3. The presence of *Wolbachia* at 100% frequency was  
223 confirmed in the B3 generation by qPCR as described below.

224 Eggs were weighed on paper in 0.225 g lots (approx. 15000 eggs) and submerged in tap water  
225 (after 1 week of desiccation) in plastic containers (16 x 16 x 8 cm), after being exposed to an  
226 air vacuum to stimulate hatching. Eggs were then transferred to a 36 x 26 x 5.5 cm trays  
227 containing 1 L of tap water. Two days after hatching, L2 larvae from the 15000 eggs were  
228 sieved and transferred into 500 mL beakers filled with seasoned water (tap water stored  
229 overnight to dechlorinise). Aliquots of larvae were taken from the beaker using 10 mL plastic  
230 pipette tips (50 larvae per aliquoted mL). Ten aliquots (1 mL each) were placed into 36 x 26 x  
231 5.5 cm trays filled with 1 L seasoned water. Cow liver powder (Difco, Becton, Dickinson and  
232 Co, Sparks, MD USA) and half-cooked cow liver were supplied to larvae daily at rates of .06,  
233 .08, .16, .31, .64, .32, .32, .32, .16, .08 and .06 mg per larva from days 1 to 11.

234 Pupae were transferred into small plastic containers with seasoned water and transferred into a  
235 mosquito cage (approximately 1000 pupae per cage). The mosquitoes were supplied with 10%  
236 sucrose solution with vitamin B complex. For blood feeding, two laboratory-reared mice were  
237 left in the cage overnight. Two days post-feeding, ovitraps (diameter 7 cm, height 9 cm) lined  
238 with A4 paper and with 200 mL of seasoned water were left for egg laying for four days. The  
239 paper was dried and then sealed in a plastic bag until use.

240 Wing measurements were carried out periodically on 15 mass reared males and 15 females for  
241 quality control. Both left and right wings of individual mosquitoes were dissected and measured  
242 under saline using DIMAS Professional version 5.0 (2) and an SSZ-T-3.5x mm graticule.

### 243 *Insecticide susceptibility assays*

244 Adult bioassays for insecticide resistance were carried out using strains from field *Ae. aegypti*  
245 from Shah Alam and *Wolbachia*-carrying *Ae. aegypti*, together with a susceptible Kuala  
246 Lumpur laboratory strain that has been in culture for over 1000 generations. One commonly-  
247 used pyrethroid (permethrin) and two organophosphates (fenitrothion and pirimiphos methyl)  
248 were tested. For the field-derived samples, 20-100 larvae were sourced from ovitraps and reared  
249 for 1-5 generations in the lab. The *Wolbachia* mosquito colony was also derived from Shah  
250 Alam (see above). Larvae were raised on liver powder and 3-5 day-old adult females were  
251 tested.

252 The bioassays followed the WHO resistance test (WHO, 2016) using insecticide impregnated  
253 papers (Vector Control Research Unit, Universiti Sains Malaysia, Penang). 10-20 adult females  
254 were used for each of the three biological replicates. The adults were exposed to papers  
255 impregnated with permethrin 0.25%, pirimiphos methyl 0.25% and fenitrothion 1.0%. Two  
256 controls were also set up for each treatment. Knockdown was scored every 5 min during a 1 hr  
257 exposure period. After exposure, the mosquitoes were transferred into paper cups with cotton  
258 soaked in 10% sugar solution. Mortality was recorded after 24 hrs. Tests were repeated during  
259 the period that the colony was used for releases, except in the case of pirimiphos methyl that  
260 was tested twice.

261 *Community engagement*

262 This strategy requires community engagement and consultation: acceptance and support of the  
263 community are essential for the releases. Printed educational materials containing clear  
264 information (e.g. leaflets, posters, buntings and banners) on *Wolbachia* were displayed and  
265 distributed. A website was established for the *Wolbachia* Malaysia Project linked at  
266 [www.imr.gov.my/wolbachia](http://www.imr.gov.my/wolbachia). The target group to engage was the head of household and  
267 communities. To engage the public, interactions were initiated with local government / political  
268 / religious and community leaders, using information kits, workshops / roadshows, meetings /  
269 briefings, carnivals and home visits. A total of 40 stakeholders and community engagement  
270 activities were conducted in places of worship and community halls. Communities and Ahli  
271 Dewan Undangan Negeri (State Assemblyman) were also invited to the Institute for Medical  
272 Research to experience first-hand the science of *Wolbachia*. These activities were designed so  
273 that the communities would possess a sense of belonging to the programme, and feel that their  
274 involvement was recognized. Public meetings reinforced the ground-level support for the trials  
275 as reflected by a willingness of community members to participate in the program. This high  
276 level of support continued throughout the release periods.

277 Engagement by a team from IPTK (Institute for Health Behavioural Research) in all 6 release  
278 sites was conducted by undertaking lectures / talks, using brochures, undertaking advertised  
279 discussions with resident groups, posting banners & bunting, providing information on a  
280 website, as well as by sending messages to resident through WhatsApp, and SMS. There were  
281 between 4 and 17 activities at a release site including meetings, briefings, dialogue, carnivals  
282 and home visits (fewer activities were carried out at sites that were used later in releases as  
283 information about the releases spread). All activities involved local political leaders,  
284 community leaders and residents. The aim was to get the community's trust in *Wolbachia*  
285 releases and the target of the community engagement team was at least 80% of the population  
286 having been exposed to the *Wolbachia* program through one or more of these approaches. The  
287 majority of the resident populations in three sites were tenants (65-70% Flat PKNS Section 7,  
288 60-70% Mentari Court, and 80% in Section 7 Commercial Centre); tenants were in general less  
289 responsive and less involved in lecture activities and group discussion compared to  
290 homeowners. In the AU2 Landed, Section 7 Landed and AU2 Flats sites, none of the residents  
291 were tenants.

292 The IPTK team carrying out engagement continuously sought community feedback throughout  
293 the period and found that the 80% exposure target was not reached in some release sites. Hence  
294 the IPTK team, after discussing with the head of the blocks and apartments as well as Joint  
295 Management Board (JMB), decided at these release sites to obtain agreement for project  
296 implementation from community leaders and each community Joint Management Board.

297 In Shah Alam Section 7 Flats and Section 7 Landed sites, the vast majority of residents  
298 surveyed agreed to be involved in the *Wolbachia* mosquito release project: 99.6% (650 of 652)  
299 of responding households gave their approval for the project. In AU2 Landed and AU2 Flats,  
300 98.4% (501 of 509) of responding households gave their approval to the project. In Shah Alam,  
301 of those responding to the survey 62.9% were male and 27.5% female, while in AU2 Keramat,  
302 50.7% were male and 33.2% female; those responding by WhatsApp and URL were  
303 unidentified and accounted for 9.7% and 16.1% from Shah Alam and AU2, respectively. In  
304 Mentari Court, the target group involved 20 community leaders rather than residents because  
305 attendance at resident meetings was low. All community leaders agreed to the release of  
306 *Wolbachia* in all the blocks and car parks in Mentari Court. The community engagement in  
307 Section 7 Commercial Centre involved briefing community leaders on the *Wolbachia* project  
308 by the IPTK team. After engagement, all 14 community leaders agreed for Commercial Centre  
309 Section 7 to be included in the project. The community leaders requested *Wolbachia* videos  
310 and health promotion materials for distribution to businesses, shops, houses and other premises,  
311 and this was provided.

312 For all release sites, the *Wolbachia* mosquito release progress was shared with the communities  
313 by inviting community representatives to the Institute on several occasions. An engagement  
314 activity in the community was also run where the development of *Wolbachia* carrying *Aedes*  
315 *aegypti* larvae were monitored in egg release breeding containers directly exposed to sunlight,  
316 partially shaded areas and shaded areas.

317 Feedback surveys on *Wolbachia* interventions were conducted prior to and after releases.  
318 Questions included the public perceptions to *Wolbachia* releases and dengue, the perception of  
319 the mosquito population size before, during and after the releases, the level of confidence in  
320 *Wolbachia* reducing dengue cases, opinions on breeding sites reduction after *Wolbachia*  
321 releases and level of concern about dengue transmission. Approximately a year after release  
322 initiation, the communities from the release sites were again invited four times for briefings  
323 and updates on the progress of the programme.

#### 324 *Mosquito releases*

325 A risk assessment was completed and permission was obtained for *Wolbachia* releases after  
326 being examined by NIH and unconditionally approved by the Malaysian Medical Research and  
327 Ethics Committee (MREC) (reference number KKM/NIHSEC/P16-566).

328 The areas of the 6 release sites are provided in Table 1 and maps of the sites are provided in  
329 Fig. 1. The dates for releases in Section 7 Flats, Section 7 Landed, Mentari Court, and  
330 Commercial Centre were 13 May 2017, 13 May 2017, 16 October 2017 and 20 November 2017  
331 respectively, while the dates for AU2 Landed and AU2 Flats were 28 March 2017 and 13  
332 September 2017 respectively. The 1<sup>st</sup> monitoring was conducted after 4 weeks of adult releases.  
333 However, for the egg releases in the Commercial Centre, the first monitoring was conducted  
334 after 4 egg releases, after 8 weeks on 15 January 2018.

335 Two days prior to the initial releases of *Wolbachia*-carrying *Ae. aegypti* in each site, fogging to  
336 suppress the wild populations was carried out using ultra low volume spray (ULV) of  
337 pyrethroids or organophosphates, in accordance with the Standard Operative Procedures of the  
338 Ministry of Health. During the trial release period, no fogging or space spraying activities were  
339 conducted within the release sites. GIS maps of release sites were prepared in order to construct  
340 release point grids, using the GIS software ArcGIS v10.5 and QGIS 3.2.3 Bonn. Release site  
341 maps were sketched based on the topography and cadastral map provided by the Department of  
342 Survey and Mapping Malaysia and with reference to Google Maps and 1MalaysiaMap  
343 (<http://1malaysiamap.mygeoportal.gov.my/>).

344 Mosquitoes were transported to the field sites in a van kept at ambient temperature. At Mentari  
345 Court, a total of 40,800 *Wolbachia*-carrying adult mosquitoes were released weekly in blocks  
346 A to G including indoor parking areas. The mosquitoes were released on every third level in  
347 each block at 4 release points, except for block G which had 6 release points. For the indoor  
348 parking building, there were 4 release points on the ground floor and 2<sup>nd</sup> floor. Four paper cups  
349 (diameter 8 cm, height 11 cm), each with 50 mosquitoes (mixed sex) were released. Following  
350 each release 10 containers were brought back to the laboratory and survival of adults was  
351 monitored; very little mortality (never > 5%) was observed. Releases were conducted for 20  
352 weeks and terminated when the *Wolbachia* frequency reached >90% on 3 consecutive  
353 monitoring periods. At the final monitoring period 98% were *Wolbachia*-carrying, as assessed  
354 through ovitraps. At Section 7 Flats, 20,400 *Wolbachia*-carrying adults were released weekly  
355 in blocks 1 to 51. There were 8 release points across 2 levels (ground floor and 2<sup>nd</sup> floor), with  
356 1 cup per release point. Releases were initially conducted across 26 weeks when *Wolbachia*  
357 frequencies exceeded >90% on 3 consecutive monitoring periods. Releases ceased for 4  
358 months, and then a second release period was undertaken for 31 weeks at a lower rate (10,200).

359 At the Section 7 Commercial Centre, releases involved eggs rather than adults. Egg containers  
360 (14.5 cm x 12.5 cm) contained 150 *Wolbachia*-carrying eggs in 400 mL of water with 180 mg  
361 liver powder. A single release hole (2 cm) was covered with a stopper. Egg containers were



362 placed at a release point in the shade, on mailboxes or near staircases. Containers were left for  
363 2 weeks. After 5 days, the stopper was removed to allow mosquitoes to emerge. Hatching rate  
364 was assessed on 5 containers by placing them in a sealed container left in the field house. Adults  
365 were counted (75-80% of the eggs produced adults).

#### 366 *Monitoring mosquito population size and Wolbachia frequency*

367 Ovitrap were used to assess *Wolbachia* frequencies and to monitor numbers of *Ae. aegypti* and  
368 *Ae. albopictus*. Each ovitrap consisted of a plastic container (96 mm height, 67 mm diameter)  
369 with 150 mL water and a wooden paddle (2 cm x 7 cm). In Mentari Court, 100 ovttraps were  
370 set up on the ground. In the apartment buildings, these were placed on the ground floor, the 2<sup>nd</sup>,  
371 5<sup>th</sup>, 8<sup>th</sup>, 11<sup>th</sup>, 14<sup>th</sup> and 17<sup>th</sup> floors. For the car park building, the 1<sup>st</sup> floor and 3<sup>rd</sup> floors were  
372 monitored. Ovttraps were collected after a week and the paddle+water was transferred to a  
373 plastic container (12 x 12 cm). All emerging mosquitoes were identified to species and a  
374 maximum of 10 *Ae. aegypti* per trap were used for *Wolbachia* screening.

375 In Section 7 Shah Alam, monitoring was done after 4 weeks from the first release using 183  
376 ovttraps, with 3 ovttraps set up per block on the ground, 3<sup>rd</sup> and 5<sup>th</sup> floors. Initially, monitoring  
377 in Mentari Court and Section 7 Shah Alam was conducted every two weeks and later every  
378 month. In Section 7 Commercial Centre, 100 ovttraps were set on the ground, middle and top  
379 floors as evenly as possible across the release zone. Monitoring was initiated after the 4<sup>th</sup> egg  
380 release on a monthly basis.

381 Adults from ovttraps were stored in absolute ethanol at -80°C. DNA was extracted from  
382 individual mosquitoes using the Chelex® 100 resin (Bio-Rad Laboratories) method.  
383 Mosquitoes were homogenised in 175 µL of 5% Chelex® solution using TissueLyser II  
384 machine (Qiagen) and with 5 µL of proteinase K (20 mg/mL) (Bioron Life Science). The  
385 extraction was incubated in thermocycler at 65°C for 1 hour, followed by incubation for 10  
386 minutes at 90°C<sup>16</sup>. *Wolbachia* was detected by high-resolution melting polymerase chain  
387 reaction (qPCR-HRM) [27] with 1:10 diluted DNA using the following *wAlbB1*-specific  
388 primers: *wAlbB1-F* (5'-CCTTACCTCCTGCACAACAA) and *wAlbB1-R* (5' –  
389 GGATTGTCCAGTGGCCTTA), as well as universal mosquito primers: *mRpS6\_F* (5'-  
390 AGTTGAACGTATCGTTTCCCGCTAC) and *mRpS6\_R* (5'-  
391 GAAGTGACGCAGCTTGTGGTCGTCC), which target the conserved region of the *RpS6*  
392 gene, and *Ae. aegypti* primers *aRpS6-F* (5'-ATCAAGAAGCGCCGTGTCG) and *aRpS6-R* (5'-  
393 CAGGTGCAGGATCTTCATGTATTTCG), which target the *Ae. aegypti*-specific  
394 polymorphisms within *RpS6* and do not amplify *Ae. albopictus*.

395 Reactions were run as 384-well plates in a LightCycler 480 II (Roche). qPCR-HRM was  
396 performed in 10 µL reactions containing 2 µL of DNA, 0.08 µL of 50 µM forward+reverse  
397 primer, 2.92 µL Milli-Q water and 5 µL Ronald's Real-Time Buffer (3.28 µL Milli-Q water,  
398 0.4 µL MgCl<sub>2</sub> (50 mM), 1.0 µL ThermoPol Reaction Buffer with 20 mM Magnesium (10x),  
399 0.25 µL HRM Master (Roche), 0.064 µL dNTPs (25 mM) and 0.01 µL Immolase™ (20 U/µL).  
400 qPCR was run following cycling conditions: 95°C for 10 min, followed by 50 cycles of 95°C  
401 for 10 seconds, 58°C for 15 seconds, 72 °C for 15 seconds. High resolution melting was  
402 performed by heating the PCR product to 95°C, and then cooling to 40°C. Then the temperature  
403 was increased to 65°C. Samples were considered positive for *Wolbachia* when the T<sub>m</sub> for the  
404 amplicon produced by the *Ae. aegypti* primers was at least 84°C and the T<sub>m</sub> for the *Wolbachia*-  
405 primer amplicon was around 80°C.

#### 406 *Dengue control activities*

407 In Mentari Court, many different control activities and education programmes have been  
408 carried out to suppress dengue. Fig. 5 shows that various activities such as source reduction,  
409 thermal fogging and Ultra Low Volume space spraying were conducted. Despite this activity,  
410 dengue cases remained high in this site. After the introduction of *Wolbachia*, there was a  
411 decrease in other activities undertaken to suppress dengue following a decrease in cases.

412 Therefore, community engagement around *Wolbachia* decreased rather than increased other  
413 control activities at this site. At the other release sites, there was no increase in non-*Wolbachia*  
414 dengue suppression activities following the initiation of releases.

#### 415 *Dengue incidence*

416 Matched control sites were selected based on similarity of constituent buildings (at least 7  
417 blocks of 12-20 floors for Mentari Court controls, at least 35 blocks of 4-7 floors for Shah Alam  
418 Flat controls, at least 15 blocks of 5-7 floors for Commercial Centre controls); and comparable  
419 dengue incidence between 2013 and the start of intervention periods. Notified dengue cases in  
420 release and control sites were recorded daily from local clinics and hospitals. All notified cases  
421 were confirmed using NS1 and IgM/IgG Combo Rapid Test Kits (RVR Diagnostics Sdn. Bhd.,  
422 Subang Jaya, Malaysia) according to manufacturer's protocols, based on the established  
423 Malaysian Dengue Clinical Practice Guidelines (CPG), available on <http://www.moh.gov.my>.

424 All notified dengue cases are recorded into the National e-dengue database at the District  
425 Health Office. Dengue cases in the population residing at the study sites were detected via this  
426 National Dengue Surveillance System. All cases were diagnosed using the National case  
427 definition guidelines (Case Definitions for Infectious Diseases in Malaysia 2017). A confirmed  
428 case of dengue was defined as fulfilling the clinical criteria for dengue infection with the  
429 following laboratory confirmation: detection of Dengue Non-Structural Protein 1 (NS1) from  
430 serum; and, detection of dengue IgM and /or IgG from a single serum sample. While there are  
431 limitations to all laboratory diagnostic tests for dengue, the dengue rapid test kits (RTK)  
432 applied in this National Surveillance System represent the most cost-effective point of care  
433 diagnostic testing at a population level. The standardized diagnostic criteria applied through  
434 this system ensures no biases in test results between the intervention and control sites.

435

#### 436 *Bayesian time series model*

437 A Bayesian time series model was used to estimate the reduction in dengue cases resulting from  
438 releases. The model structure was as follows:

$$\begin{aligned} 439 \quad & y_{i,t} \sim \text{Poisson}(\lambda_{i,t} N_i) \\ 440 \quad & \ln(\lambda_{i,t}) = \alpha_i + \gamma_{i,t} + \beta x_i \\ 441 \quad & \gamma_{i,t} = \rho \gamma_{i,t-1} + \epsilon_{i,t}; \gamma_{i,0} = 0 \end{aligned}$$

$$445 \quad r \sim N^+(0, 100); \epsilon_{i,t} \sim N(0, \sigma^2); \rho \sim U(-1, 1); \sigma \sim N^+(0, 100); \alpha_i \sim N(0, 100)$$

442 where the number of cases  $y$  at each site  $i$  and week  $t$  were assumed to follow a Poisson  
443 distribution, with the expected count given by the product of population at that site, and the per-  
444 capita incidence which varied varying through time and between sites. Each site had a separate  
445 time series of log-incidences  $\alpha_i + \gamma_{i,t}$  with temporal correlation driven by an autoregressive  
446 model of order one, with parameters  $\rho$  and  $\sigma^2$  shared by all sites. Each observation therefore  
447 had a separate (temporally-correlated) random effect on the log scale, to account for extra-  
448 Poisson dispersion and temporal correlation. The intervention effect was represented by a  
449 parameter  $\beta$  and an indicator variable  $x_i$  for whether the observation was post-release at a  
450 release site. Model parameters were assigned vague normal; positive-truncated normal; or  
451 uniform priors. The model was used both to estimate the impact of the releases, and to assess  
452 the evidence from the dengue case data that releases lead to a reduction in incidence - quantified  
453 as the posterior probability that  $\beta$  is negative, in the absence of prior knowledge about the  
454 direction of the effect.

456 Posterior samples of model parameters were simulated by Hamiltonian Monte Carlo in greta  
457 [29] with 4 chains, each yielding 4000 posterior samples of model parameters after a warmup  
458 period of 1000 iterations during which period the leapfrog step size and diagonal mass matrix  
459 parameters were tuned. The number of leapfrog steps was sampled uniformly from between 30

460 and 40 throughout. Convergence was assessed by the Gelman-Rubin  $\hat{R}$  diagnostic, using the  
461 coda R package [30] ( $\hat{R} \leq 1.01$  for all parameters) and visual assessment of trace plots. Model  
462 fit was assessed by posterior predictive simulation: a random dataset of  $y_{i,t}$  values was  
463 generated according to each posterior sample of  $p_{i,t}$  and  $r$ , and the distributions of the simulated  
464  $y_{i,t}$  values were compared with the observed  $y_{i,t}$ . The analysis code is freely available online  
465 (code attached with submission and archive URL to be provided here on acceptance).

466

## 467 **Acknowledgments**

468 The primary funding for the study was provided by Wellcome Trust Award 108508, with  
469 additional funding from Wellcome Trust Award 202888 and National Health and Medical  
470 Research Council of Australia Awards 1118640 and 1132412.

471

## 472 **References**

- 473 1. Bhatt PW, Gething PW, Brady OJ, Messina JP, Farlow AW, Moyes CL, et al. The global  
474 distribution and burden of dengue. *Nature* 2013; 496:504-507.
- 475 2. Xi Z, Khoo CC, Dobson SL. *Wolbachia* establishment and invasion in an *Aedes aegypti*  
476 laboratory population. *Science*. 2005; 310:326-8.
- 477 3. McMeniman CJ, Lane RV, Cass BN, Fong AW, Sidhu M, Wang YF, et al. Stable  
478 introduction of a life-shortening *Wolbachia* infection into the mosquito *Aedes aegypti*.  
479 *Science*. 2009; 323:141-4.
- 480 4. Moreira LA, Iturbe-Ormaetxe I, Jeffery JA, Lu G, Pyke AT, Hedges LM, et al. A  
481 *Wolbachia* symbiont in *Aedes aegypti* limits infection with dengue, Chikungunya, and  
482 *Plasmodium*. *Cell*. 2009; 139:1268-78.
- 483 5. Bian G, Xu Y, Lu P, Xie Y, Xi Z. The endosymbiotic bacterium *Wolbachia* induces  
484 resistance to dengue virus in *Aedes aegypti*. *PLoS Pathog*. 2010; 6:e1000833.
- 485 6. Walker T, Johnson PH, Moreira LA, Iturbe-Ormaetxe I, Frentiu FD, McMeniman CJ, et al.  
486 The wMel *Wolbachia* strain blocks dengue and invades caged *Aedes aegypti* populations.  
487 *Nature*. 2011; 476:450-3.
- 488 7. Hoffmann AA, Montgomery BL, Popovici J, Iturbe-Ormaetxe I, Johnson PH, Muzzi F, et  
489 al. Successful establishment of *Wolbachia* in *Aedes* populations to suppress dengue  
490 transmission. *Nature*. 2011; 476:454-7.
- 491 8. Hoffmann AA, Iturbe-Ormaetxe I, Callahan AG, Phillips BL, Billington K, Axford JK, et  
492 al. Stability of the wMel *Wolbachia* Infection following invasion into *Aedes aegypti*  
493 populations. *PLoS Negl Trop Dis*. 2014; 8:e3115
- 494 9. Frentiu FD, Zakir T, Walker T, Popovici J, Pyke AT, van den Hurk A, et al. Limited dengue  
495 virus replication in field-collected *Aedes aegypti* mosquitoes infected with *Wolbachia*.  
496 *PLoS Negl Trop Dis*. 2014; 8:e2688.
- 497 10. O'Neill SL, Ryan PA, Turley AP, Wilson G, Retzki K, Iturbe-Ormaetxe I, et al. Scaled  
498 deployment of *Wolbachia* to protect the community from dengue and other *Aedes*  
499 transmitted arboviruses. *Gates Open Res*. 2018; 2:36.
- 500 11. Barton NH, Turelli M. Spatial waves of advance with bistable dynamics: Cytoplasmic and  
501 genetic analogues of Allee effects. *Am. Nat* 2011; 178:E48-E75.
- 502 12. Hancock PA, Sinkins SP., Godfray HCJ. Population dynamic models of the spread of  
503 *Wolbachia*. *Am Nat*. 2011; 177:323-333.
- 504 13. Ulrich JN, Beier JC, Devine GJ, Hugo LE. Heat sensitivity of wMel *Wolbachia* during  
505 *Aedes aegypti* development. *PLoS Negl Trop Dis*. 2016; 10:e0004873.
- 506 14. Ross P, Wiwatanaratnabutr I, Axford J, White V, Endersby-Harshman N, Hoffmann A.  
507 *Wolbachia* infections in *Aedes aegypti* differ markedly in their response to cyclical heat  
508 stress. *PLOS Pathog*. 2017; 13:e1006006.

- 509 15. Nguyen TH, Nguyen HL, Nguyen TY, Vu SN, Tran ND, Le TN, et al. Field evaluation of  
510 the establishment potential of wMelPop *Wolbachia* in Australia and Vietnam for dengue  
511 control. *Parasit Vectors*. 2015; 8:563.
- 512 16. Ant TH, Herd CS, Geoghegan V, Hoffmann AA, Sinkins SP. The *Wolbachia* strain wAu  
513 provides highly efficient virus transmission blocking in *Aedes aegypti*. *PLOS Pathog*. 2018;  
514 14:e1006815.
- 515 17. Hemme R., Tank JL, Chadee DD, Severson DW. Environmental conditions in water  
516 storage drums and influences on *Aedes aegypti* in Trinidad, West Indies. *Acta Trop*.  
517 2009; 112:59-66.
- 518 18. Crisis Preparedness and Response Centre [CPRC]. Bahagian Kawalan Penyakit,  
519 Kementerian Kesihatan Malaysia [KKM] [2016]. Available from:  
520 <http://idengue.remotesensing.gov.my/idengue/index.php>.
- 521 19. Packierisamy PR, Ng CW, Dahlui M, Inbaraj J, Balam VK, Halasa YA, et al. Cost of  
522 dengue vector control activities in Malaysia. *Am J Trop Med Hyg* 2015; 93:1020-1027.
- 523 20. How to design vector control efficacy trials, guidance on phase III vector control field  
524 trial design. Geneva: World Health Organization: 2017.
- 525 21. Schmidt TL, Barton NH, Rašić G, Turley AP, Montgomery BL, Iturbe-Ormaetxe I, et al.  
526 Local introduction and heterogeneous spatial spread of dengue-suppressing *Wolbachia*  
527 through an urban population of *Aedes aegypti*. *PLOS Biol*. 2017; 15:e2001894.
- 528 22. Blagrove MS, Arias-Goeta C, Failloux AB, Sinkins SP. *Wolbachia* strain wMel induces  
529 cytoplasmic incompatibility and blocks dengue transmission in *Aedes albopictus*. *Proc Natl*  
530 *Acad Sci USA*. 2012; 109:255-60.
- 531 23. Blagrove MS, Arias-Goeta C, Di Genua C, Failloux AB, Sinkins SP. A *Wolbachia* wMel  
532 transinfection in *Aedes albopictus* is not detrimental to host fitness and inhibits  
533 Chikungunya virus. *PLoS Negl Trop Dis*. 2013; 7:e2152.
- 534 24. Moyes CL, Vontas J, Martins AJ, Ng LC, Koou SY, Dusfour I, et al. Contemporary status  
535 of insecticide resistance in the major *Aedes* vectors of arboviruses infecting humans. *PLOS*  
536 *Negl Trop Dis*. 2017; 11:e0005625.
- 537 25. Yeap HL, Endersby NM, Johnson PH, Ritchie SA, Hoffmann AA. Body size and wing  
538 shape measurements as quality indicators of *Aedes aegypti* mosquitoes destined for field  
539 release. *Am J Trop Med Hyg*. 2013; 89:78-92.
- 540 26. Ross PA, Endersby NM, Yeap HL, Hoffmann AA. Larval competition extends  
541 developmental time and decreases adult size of wMelPop *Wolbachia*-infected *Aedes*  
542 *aegypti*. *Am J Trop Med Hyg*. 2014; 91:198-205.
- 543 27. Lee SF, White VL, Weeks AR, Hoffmann AA, Endersby NM. High-throughput PCR  
544 assays to monitor *Wolbachia* infection in the dengue mosquito [*Aedes aegypti*] and  
545 *Drosophila simulans*. *Appl Environ Microbiol* 2012; 78:4740-3.
- 546 28. Allard R. Use of time-series analysis in infectious disease surveillance. *Bull WHO*. 1998;  
547 76:327-333.
- 548 29. Golding N. greta: simple and scalable statistical modelling in R. R package version  
549 0.3.0.9002. <https://github.com/greta-dev/greta>: 2018.
- 550 30. Plummer M., Best, N., Cowles, K., Vines, K. CODA: Convergence Diagnosis and Output  
551 Analysis for MCMC. *R News* 2006; 6:7-11.
- 552 31. Hancock, P. White, V.L. Callahan, A.G. Godfray, C.H.J. Hoffmann, A.A. Ritchie, S.A.  
553 [2015]. Density-dependent population dynamics in *Aedes aegypti* slow the spread of  
554 wMel *Wolbachia*. *J Appl Ecol* 53:785-793.
- 555 32. van den Hurk AF, Hall-Mendelin S, Pyke AT, Frentiu FD, McElroy K, Day A, et al.  
556 Impact of *Wolbachia* on infection with chikungunya and yellow fever viruses in the  
557 mosquito vector *Aedes aegypti*. *PLoS Negl Trop Dis*. 2012; 6:e1892.
- 558 33. Dutra HL, Rocha MN, Dias FB, Mansur SB, Caragata EP, Moreira LA. *Wolbachia* blocks  
559 currently circulating Zika virus isolates in Brazilian *Aedes aegypti* mosquitoes. *Cell Host*  
560 *Microbe*. 2016; 19:771-4.

561 **Author contributions:** S.P.S., A.A.H. conceived the study; W.A.N., A.N.A., Y.L.C.,

562 M.V.M., M.R.G.K., A.K.M.A., H.T., H.S.N.S., M.Z.N.Z.A., M.M.N.R., A.S.N.S., A.F.,  
563 M.N.F.R.I., S.R., N.N., M.M.N.N., M.S.M., N.M.E-H., V.L.W., T.H.A., C.H., H.A.H.,  
564 R.A.B., M.D.H., K.K., D.K., S.C.L., M.P., K.F. performed the experimental work; A.A.H.,  
565 Y.L.C., N.G., B.S.G., M.V.M., S.P.S. analysed the data; A.A.H., S.P.S., W.A.N., H.L.L.  
566 supervised the project; S.P.S., A.A.H. wrote the manuscript; all authors reviewed the  
567 manuscript.

568 The authors declare no competing interests.

569 **Correspondence** should be addressed to [steven.sinkins@glasgow.ac.uk](mailto:steven.sinkins@glasgow.ac.uk),  
570 [ary@unimelb.edu.au](mailto:ary@unimelb.edu.au); [nazni@imr.gov.my](mailto:nazni@imr.gov.my)

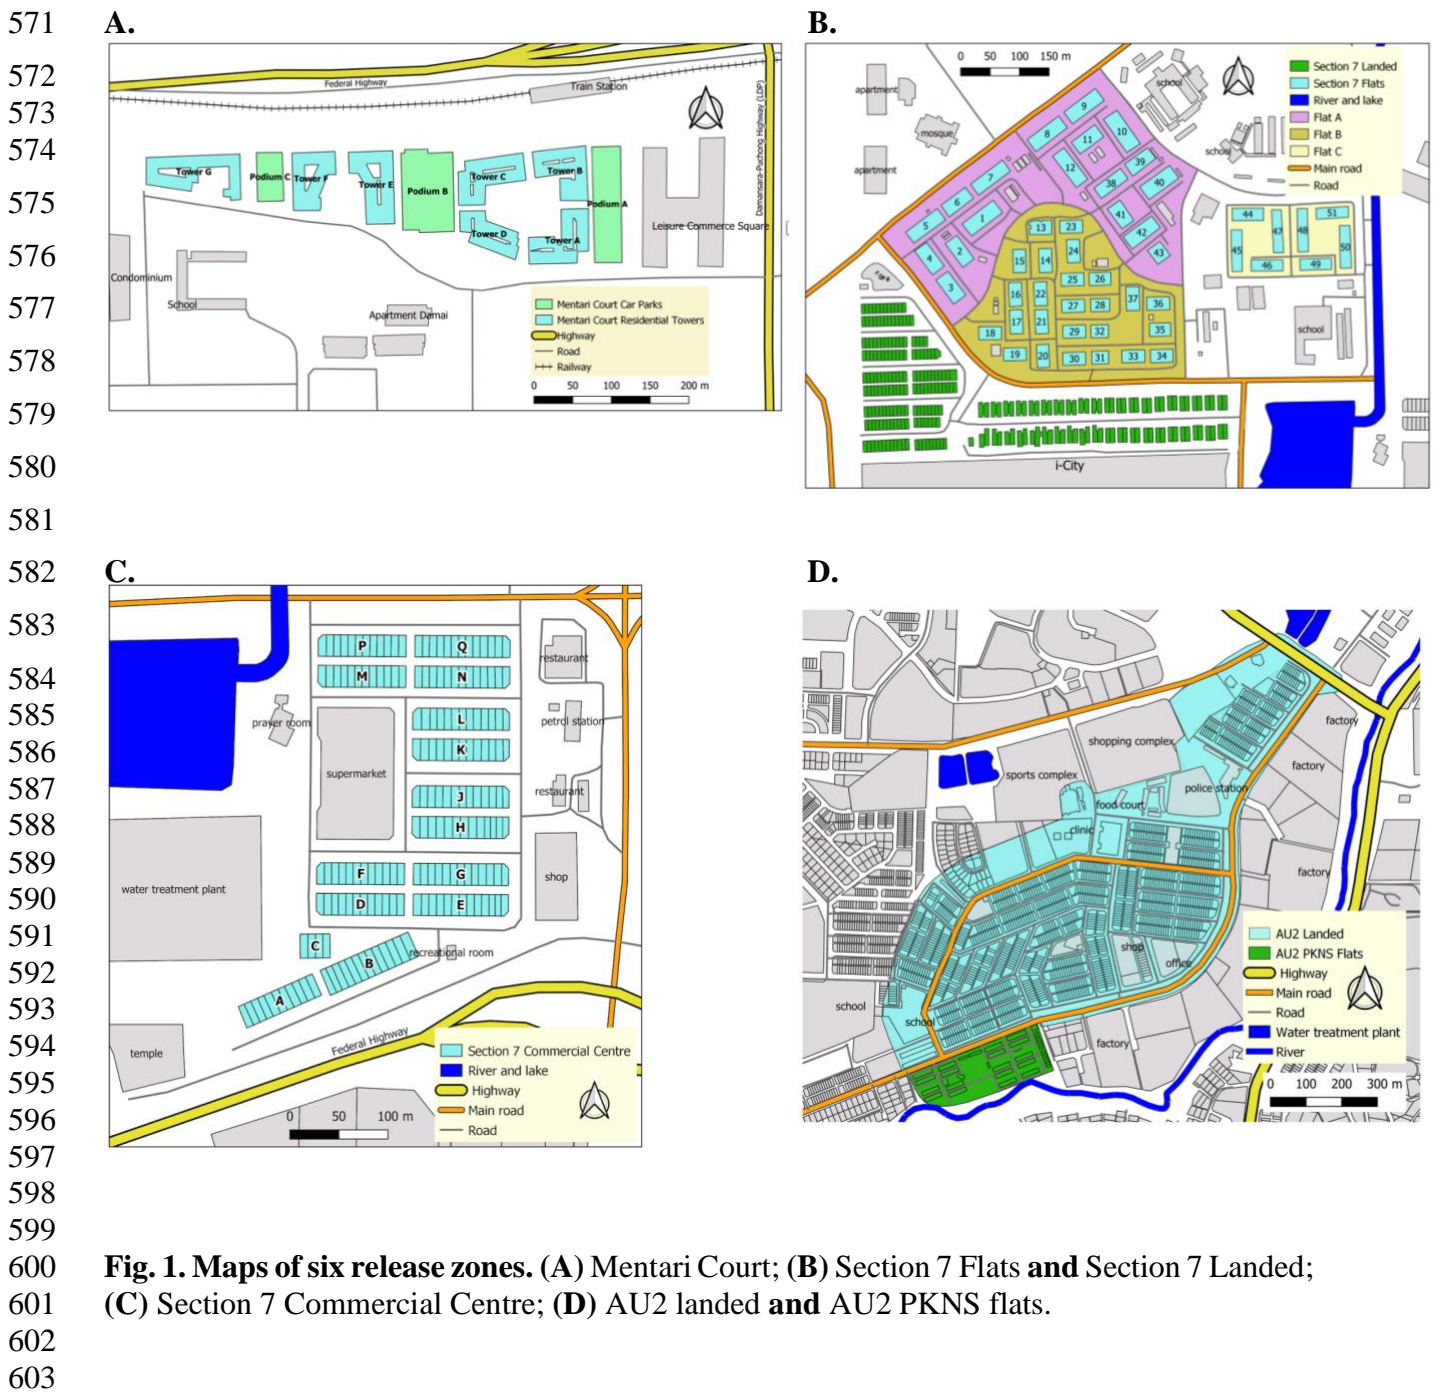

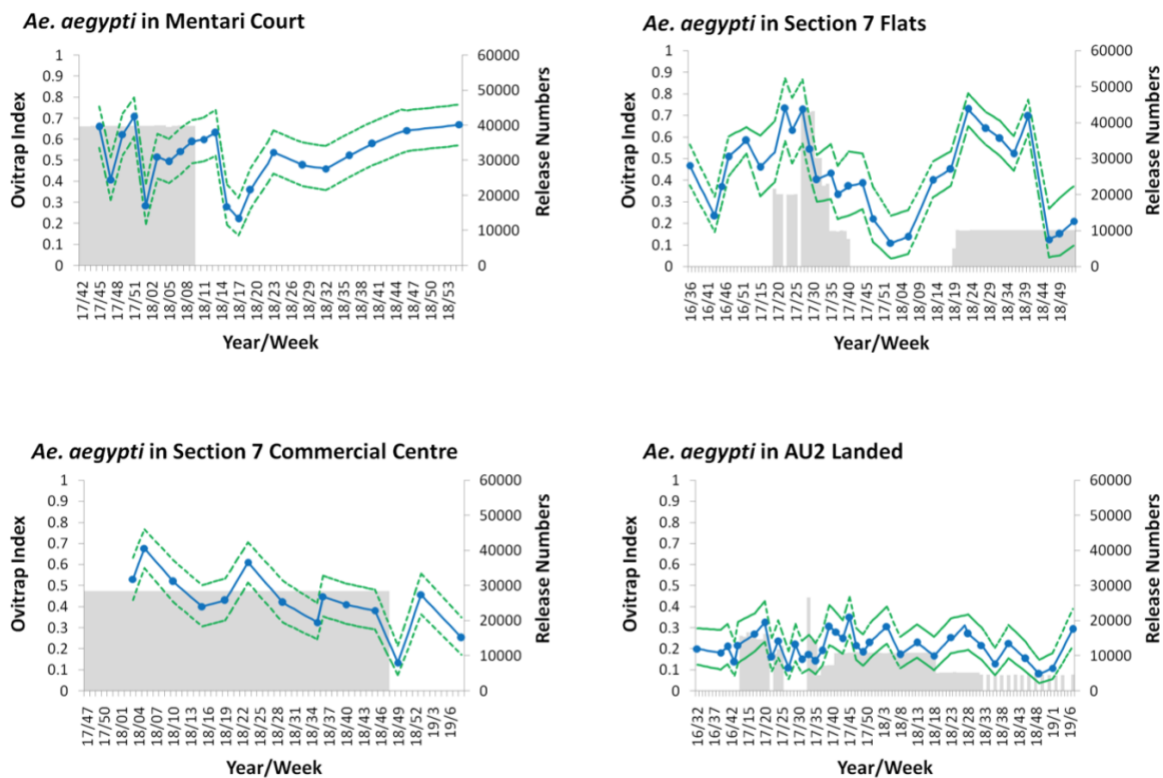

604  
605  
606  
607  
608  
609  
610

**Fig. 2.** *Ae. aegypti* population size estimates at release sites. Ovitrap index (*Ae. aegypti*-positive traps divided by total number of traps) measured during the release/monitoring period. Grey shaded areas represent release periods; 95% confidence intervals are shown as dotted lines.

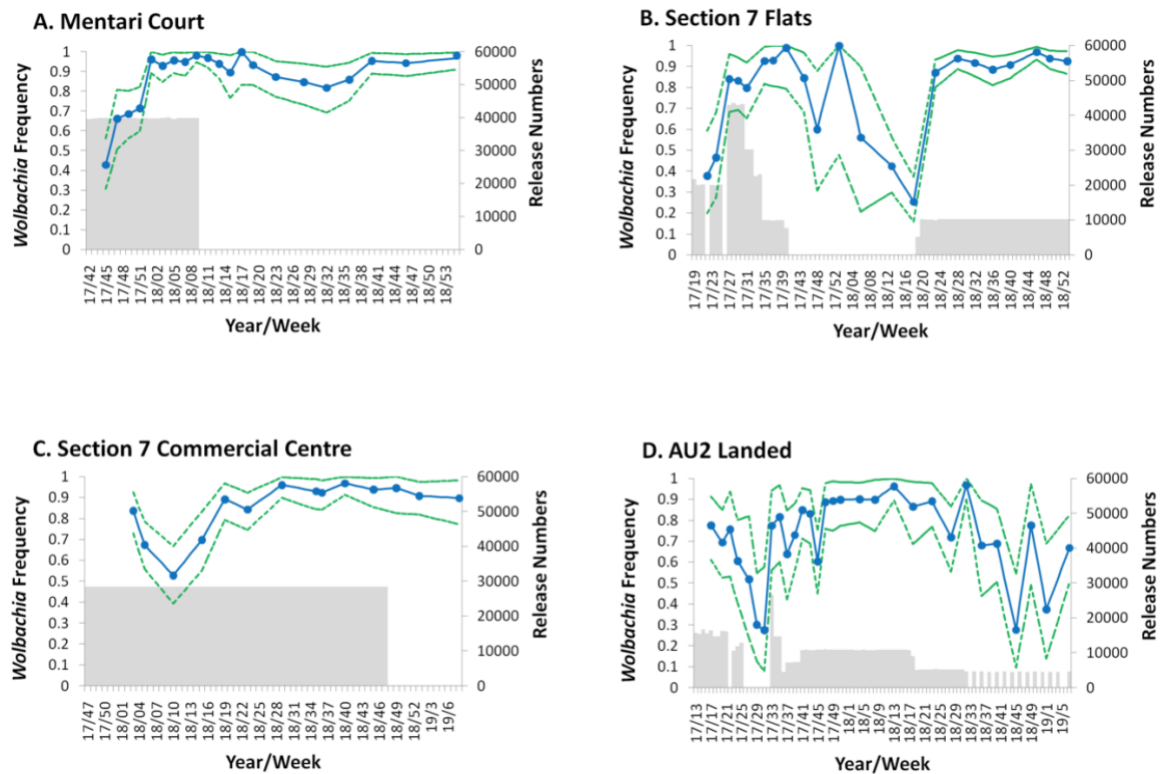

611  
612

613 **Fig. 3. *Wolbachia* frequency during and after releases at six sites.** Monitoring was  
614 conducted using ovitrapping and qPCR. **(A)** Mentari Court; **(B)** Shah Alam Section 7 Flats;  
615 **(C)** Shah Alam Section 7 Commercial Centre; **(D)** AU2 Landed. Release numbers are shown  
616 in grey shading; 95% confidence intervals are shown as dotted lines.



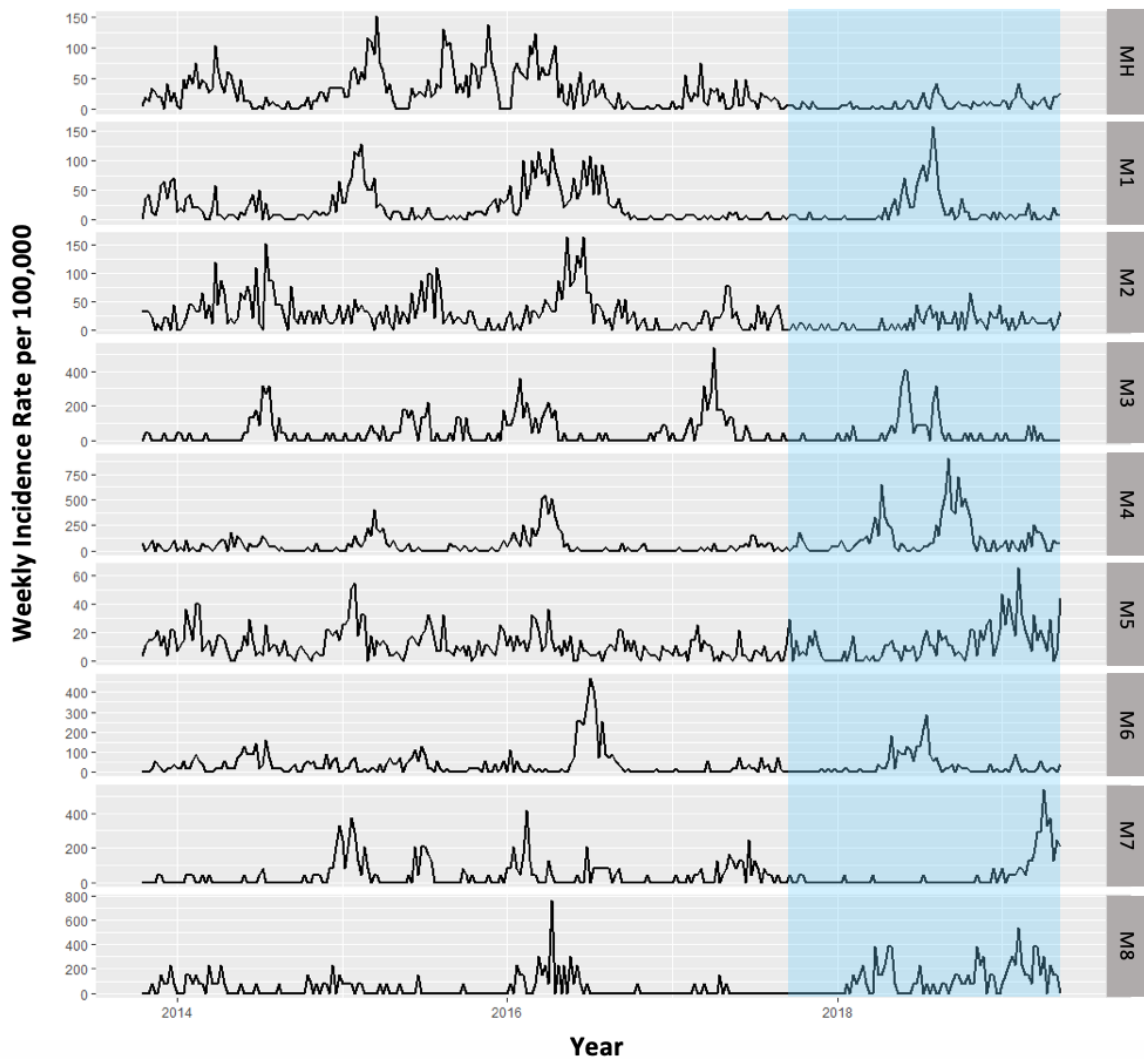

617  
618  
619  
620  
621  
622

**Fig. 4. Dengue incidence from 2013 in Mentari Court (MH) and matched control sites (M 1-8).** The period during and after commencement of *wAlbB*-carrying *Ae. aegypti* releases are indicated by blue (for other sites and their matched controls see Fig. S7). Incidence is calculated as total confirmed dengue cases per total population \* 100,000.

623

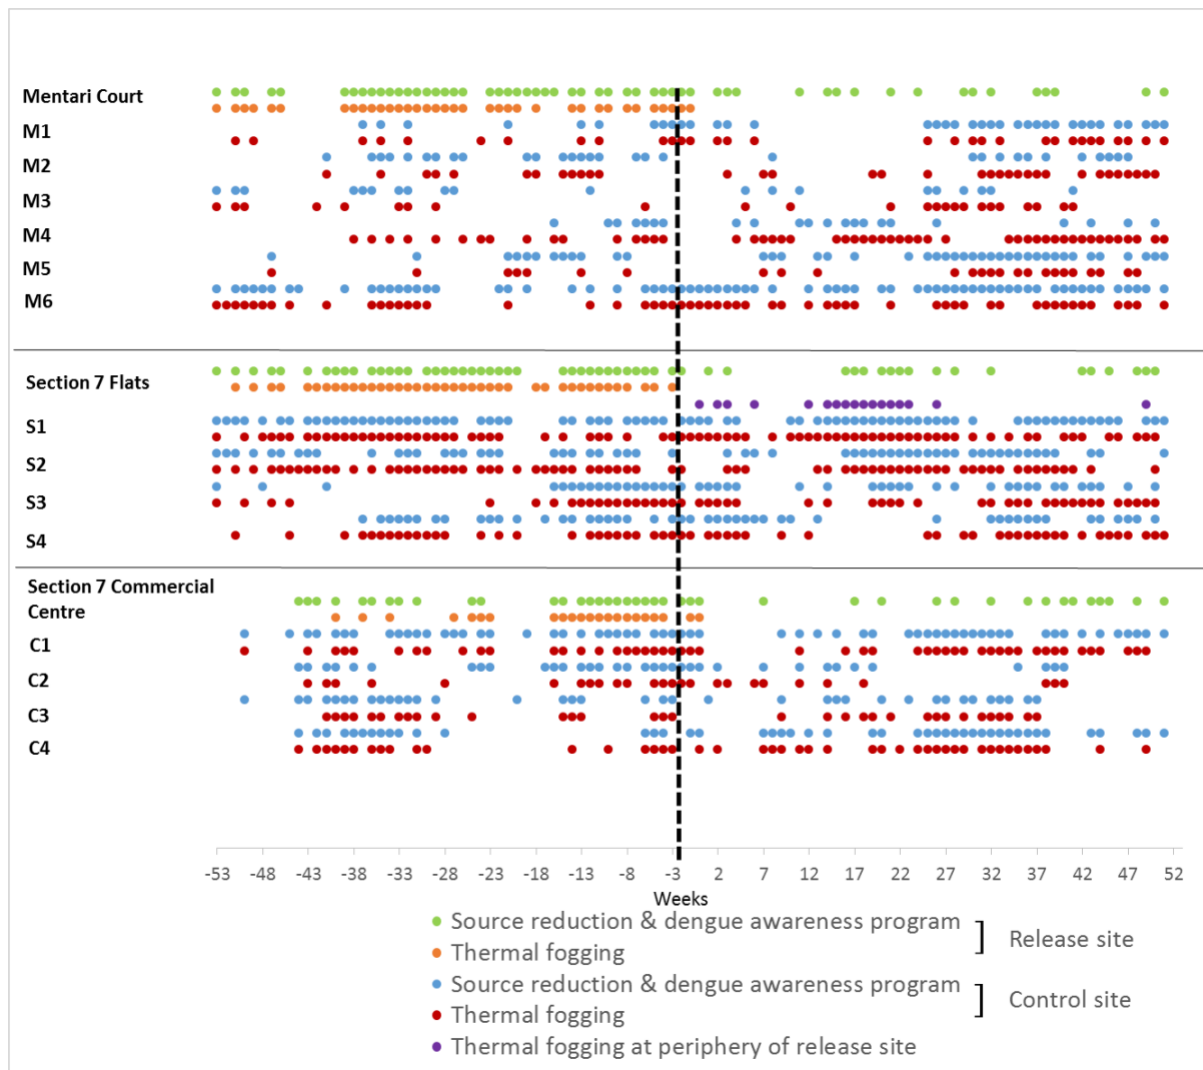

624  
625  
626  
627  
628  
629  
630  
631  
632

**Fig. 5. Dengue control activities (other than *Wolbachia* release) at the Section 7 Commercial Centre, Mentari Court and Section 7 PKNS Flats in release and matched control sites.** The date of first *Wolbachia* releases is indicated by the black dashed line, and activities carried out in the year before and year after this date are shown. Data were only available for three release sites. Thermal fogging at the periphery refers to fogging done at nearby construction sites.

633 **Table 1.** Information on release and control sites identified from criteria discussed in main  
 634 text. \*rate per 100,00, from Jan 2013 until start of intervention. Release sites are in bold.  
 635

| Type of site      | Site name                                 | Blocks (bl), floors (f)          | Dengue Incidence* | Approx. no. households | Area (m <sup>2</sup> ) |
|-------------------|-------------------------------------------|----------------------------------|-------------------|------------------------|------------------------|
| <b>Release-MH</b> | <b>Mentari Court</b>                      | <b>7bl, 18f</b>                  | <b>7,371.41</b>   | <b>3,469</b>           | <b>90,267</b>          |
| Control-M1        | Lagoon Perdana                            | 7bl, 18f                         | 4,974.05          | 3,322                  | 46,713                 |
| Control-M2        | PJU 8 Apartment Flora Damansara           | 8bl, 24f                         | 6,937.23          | 2,200                  | 74,726                 |
| Control-M3        | Seksyen 13 Apart. Brunsfield Riverview    | 3bl, 14f                         | 11,725.74         | 532                    | 10,329                 |
| Control-M4        | Seksyen 13 Apartment Perdana              | 4bl, 5-10f                       | 11,977.35         | 656                    | 28,486                 |
| Control-M5        | Desa Mentari                              | 11bl, 12-18f                     | 2,566.06          | 6,560                  | 54,126                 |
| Control-M6        | Kelana Puteri & Putera Condominium        | 11bl, 16-20f                     | 7,726.39          | 1,322                  | 56,586                 |
| Control-M7        | Section U2 Apartment Ilham                | 4 bl, 18f                        | 9,176.59          | 576                    | 16,366                 |
| Control-M8        | Section 7 Apartment Baiduri               | 4 bl, 9-10f                      | 8,547.01          | 312                    | 21,000                 |
| <b>Release-SF</b> | <b>Section 7 Flats</b>                    | <b>51bl, 5f</b>                  | <b>11,539.09</b>  | <b>2,930</b>           | <b>276,261</b>         |
| <b>Release-SL</b> | <b>Section 7 Landed</b>                   | <b>landed houses</b>             | <b>14,592.93</b>  | <b>248</b>             | <b>113,817</b>         |
| Control-S1        | Flat Section 6, 7 (BI52-58) & 8           | 42bl, 5f                         | 6,850.23          | 1,790                  | 154,060                |
| Control-S2        | Flat Section 16, 17 & 18                  | 68bl, 4-5f                       | 6,341.79          | 1,712                  | 167,197                |
| Control-S3        | Flat Section 19, 20                       | 37bl, 5f                         | 6,196.28          | 1,806                  | 170,790                |
| Control-S4        | Flat Section 24                           | 77bl, 5f                         | 3,504.36          | 4,260                  | 151,620                |
| <b>Release-SC</b> | <b>Section 7 Commercial Centre</b>        | <b>15bl, 4-5f shop apartment</b> | <b>13,325.22</b>  | <b>1,408</b>           | <b>119,025</b>         |
| Control-C1        | Section 15 (Dataran Otomobil)             | 18bl, 4-5f                       | 9,042.88          | 1,406                  | 76,048                 |
| Control-C2        | Flat Section 27                           | 31bl, 4-8f                       | 4,715.82          | 3,100                  | 157,364                |
| Control-C3        | Flat & Apartment Section U3               | 17bl, 5f                         | 3,677.25          | 1,800                  | 104,763                |
| Control-C4        | Apartment Section U5                      | 23bl, 5-7f                       | 3,681.08          | 2,736                  | 139,404                |
| <b>Release-AL</b> | <b>AU2 Landed, Keramat</b>                | <b>landed houses</b>             | <b>4,170.03</b>   | <b>1,239</b>           | <b>727,548</b>         |
| <b>Release-AF</b> | <b>AU2 PKNS Flats</b>                     | <b>18bl, 4f</b>                  | <b>1,452.66</b>   | <b>672</b>             | <b>50,598</b>          |
| Control-A1        | AU5 Landed, Keramat                       | landed houses                    | 4,176.53          | 724                    | 585,476                |
| Control-A2        | Taman Samudera & Taman Sunway, Batu Caves | landed houses                    | 4,270.45          | 1996                   | 759,719                |
| Control-A3        | Bandar Tasik Puteri Fasa 6 & 7, Rawang    | landed houses                    | 3,482.59          | 1675                   | 841,977                |

636  
637

638 **Supporting Information**

639

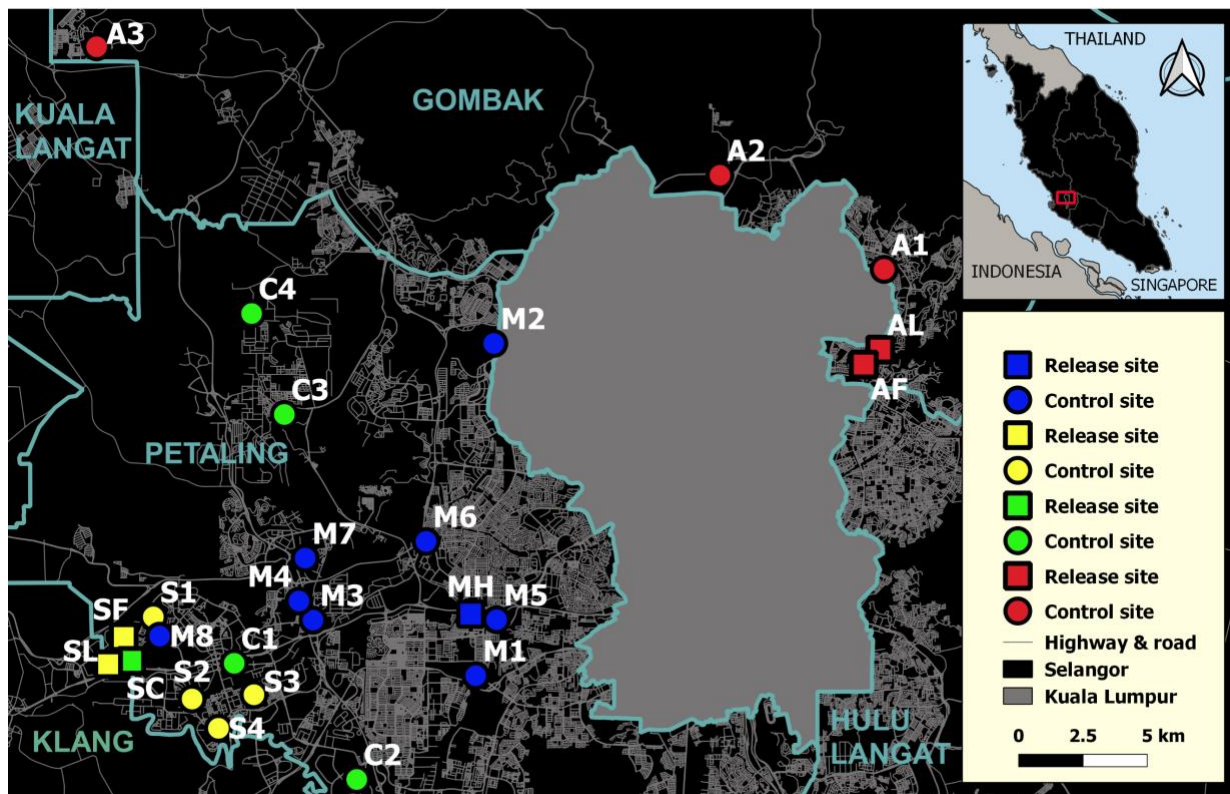

640

641

642

643

644

645

646

647

**Fig. S1.** Maps of all six release zones and controls in the Petaling and Gombak Districts of Selangor: Mentari Court high rise (MH) and controls (M1-M8); S7 Flats & Landed (SF & SL) and controls (S1-S4); S7 Commercial (SC) and controls (C1-C4); AU2 landed & AU2 PKNS Flats (AL & AF) and controls (A1-3). Table 1 contains additional details about release and controls sites. Map constructed using [MapCruzin.com](http://MapCruzin.com), [OpenStreetMap.org](http://OpenStreetMap.org) under the Open Database License (<http://opendatacommons.org/licenses/odbl/1.0/>).

648

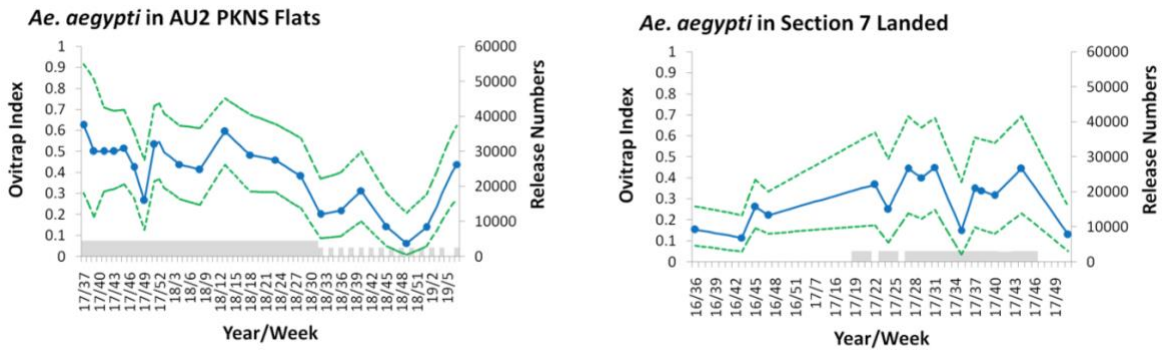

649

650

651

652

653

654

**Fig. S2.** *Aedes aegypti* population size estimates for two smaller secondary release sites through ovitrap index (*Ae. aegypti*- positive traps divided by total number of traps) during the release/monitoring period. Grey shaded areas represent release periods; 95% confidence intervals are shown as dotted lines.

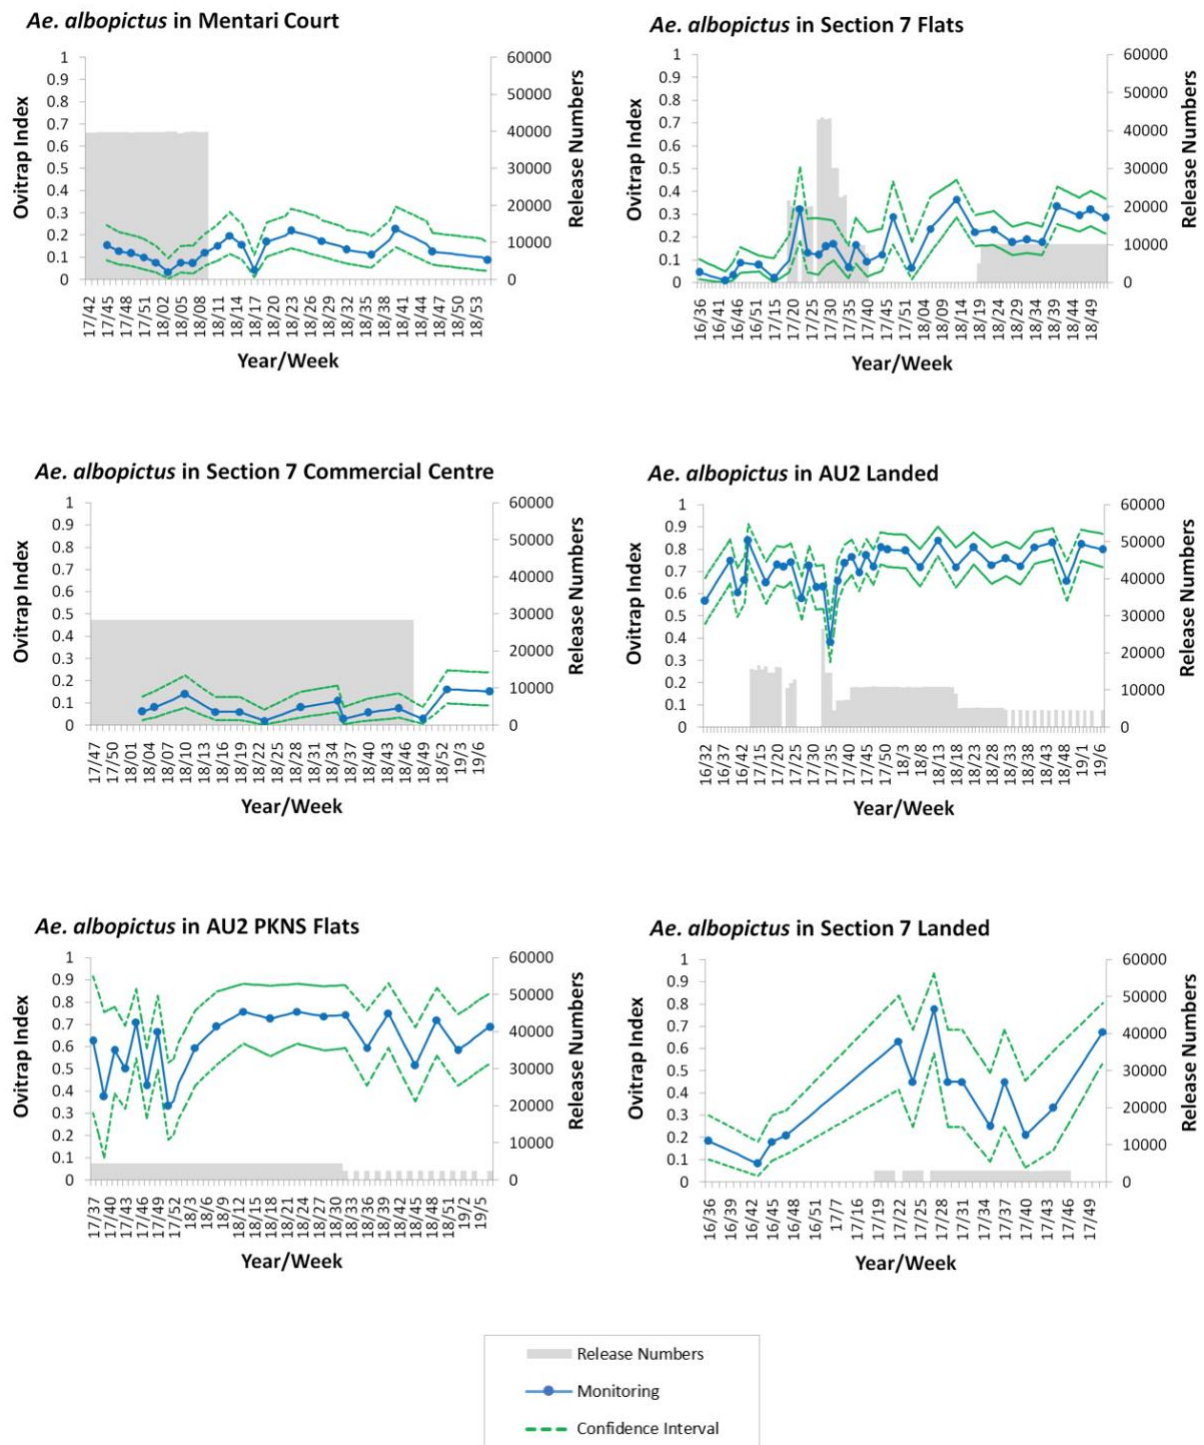

655  
656  
657  
658  
659  
660  
661

**Fig. S3.** *Aedes albopictus* population size estimates at release sites measured by ovitrap index (*Ae. albopictus*-positive traps divided by total number of traps) during the release/monitoring period. Grey shaded areas represent release periods; 95% confidence intervals are shown as dotted lines.

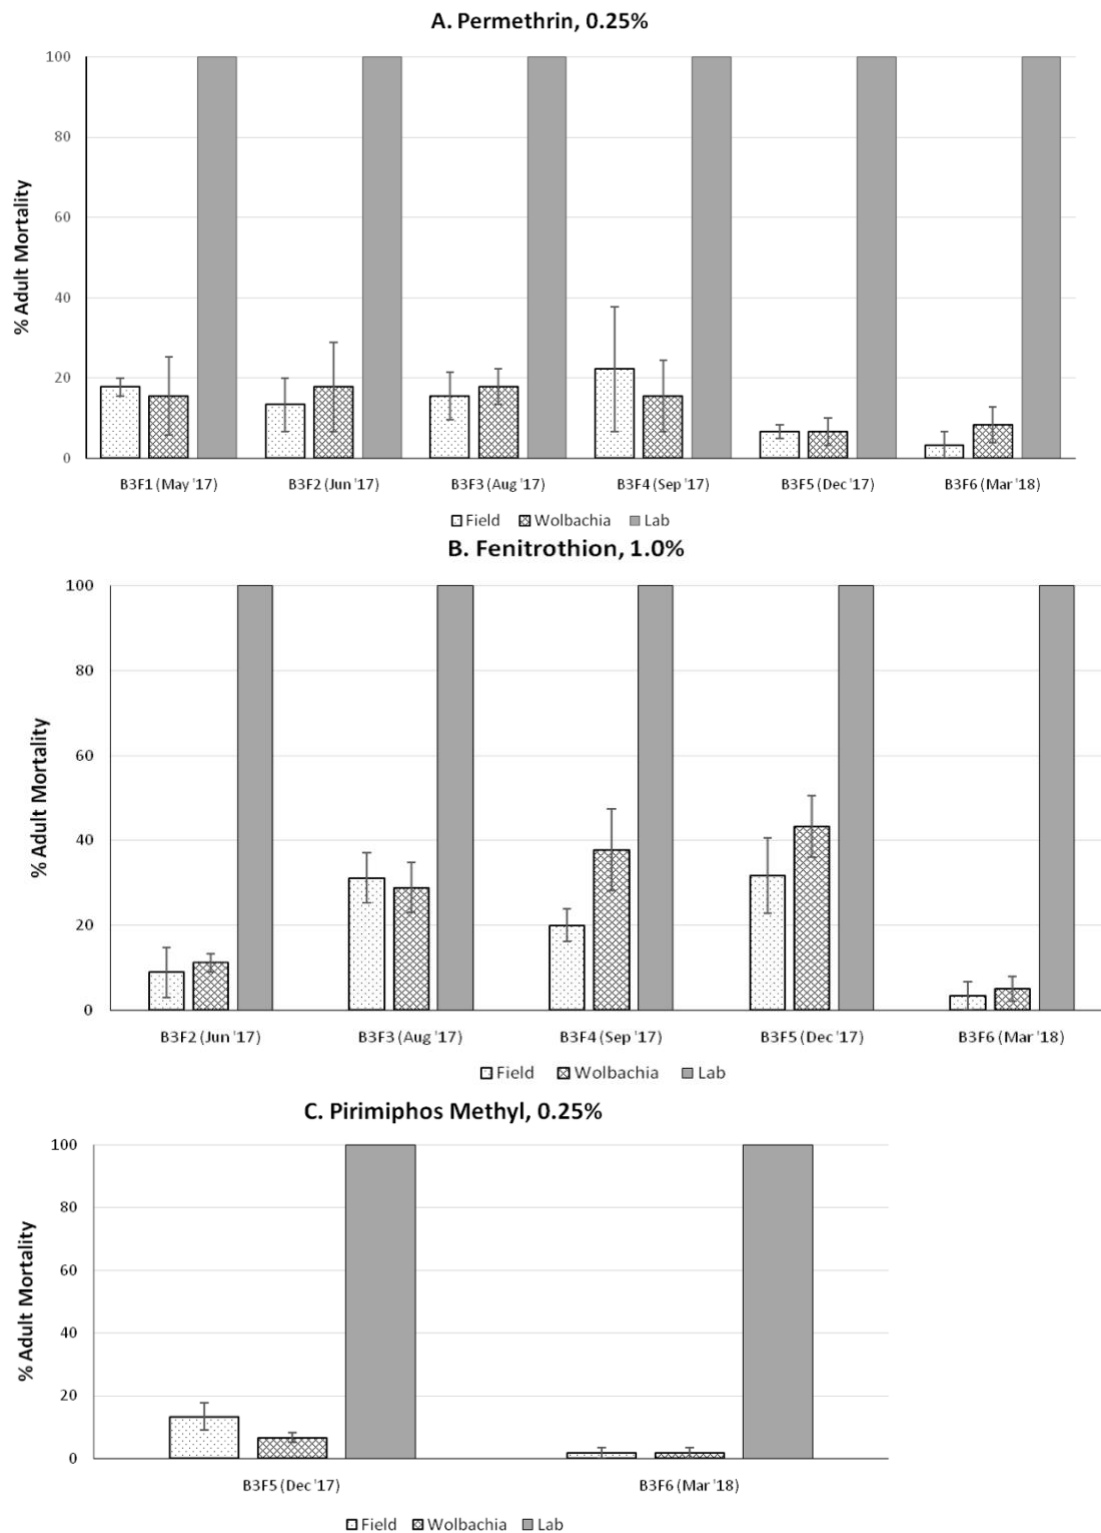

662

663

664

665

666

667

668

669

670

**Fig. S4.** Insecticide susceptibility of the release line (“Wolbachia”) compared with the field-derived wild-type population of *Ae. aegypti* (“Field”) and a laboratory insecticide susceptible line (“Lab”) tested against three pesticides: permethrin, fenitrothion, and pirimiphos methyl. Bioassays measured adult mortality at discriminating doses. Error bars represent standard errors.

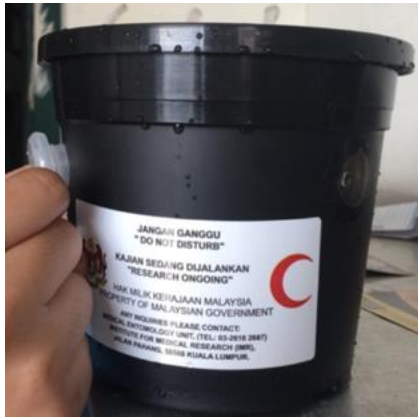

671  
672  
673  
674  
675

**Fig. S5.** Example of an egg release container as used in the Section 7 Commercial Centre site; note the 2 cm diameter release holes and plug, removed to allow escape of adult mosquitoes.



676

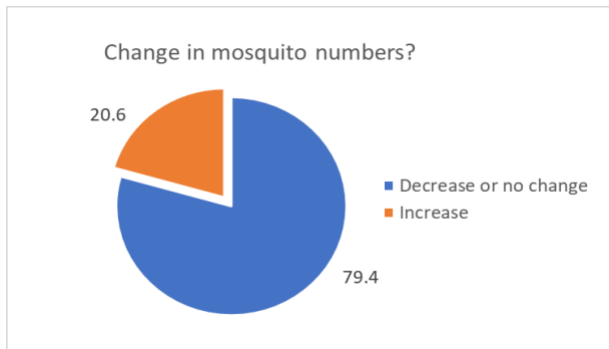

677

678

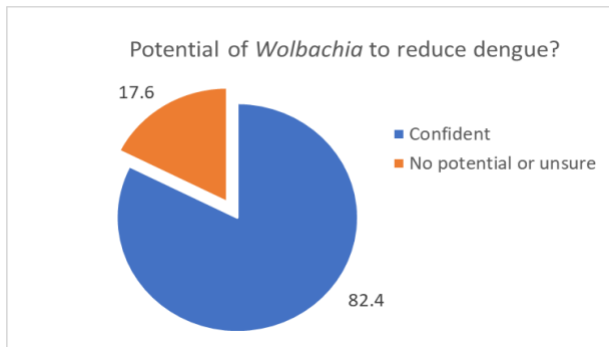

679

680

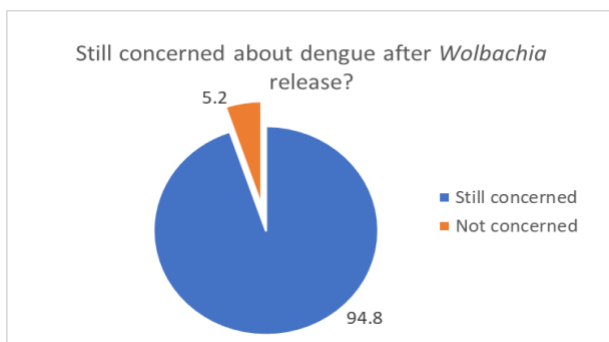

681

682

683

684

685

686

687

**Fig. S6.** Post-release survey questionnaire results from community engagement activities in Section 7 Flats. Data were collected from a door-to-door survey in the Section 7 Flats release area 2 months after the beginning of the releases. 196 respondents were included, consisting of 40% females, with age classes 29-39 (15%), 40-50 (65%) and >60 (10%).

688 **Section 7 Flats / Landed**

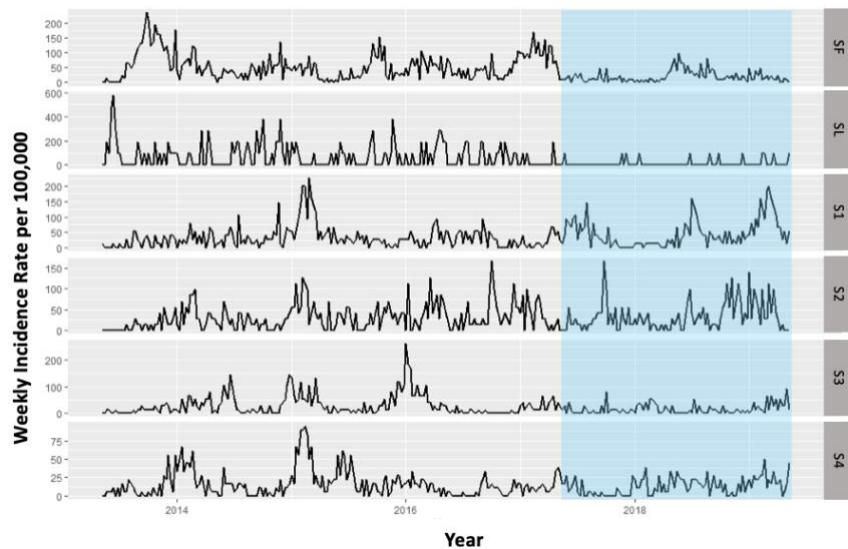

689  
690 **Section 7 Commercial Centre**

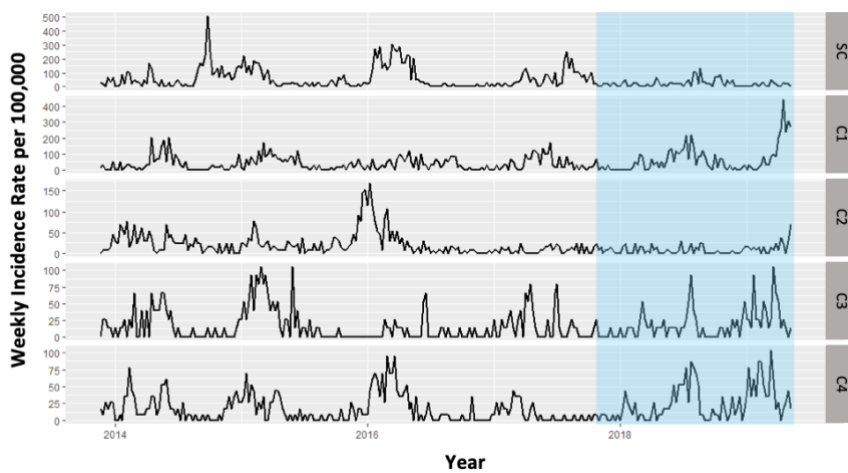

691  
692 **AU2 Landed and AU2 Flats**

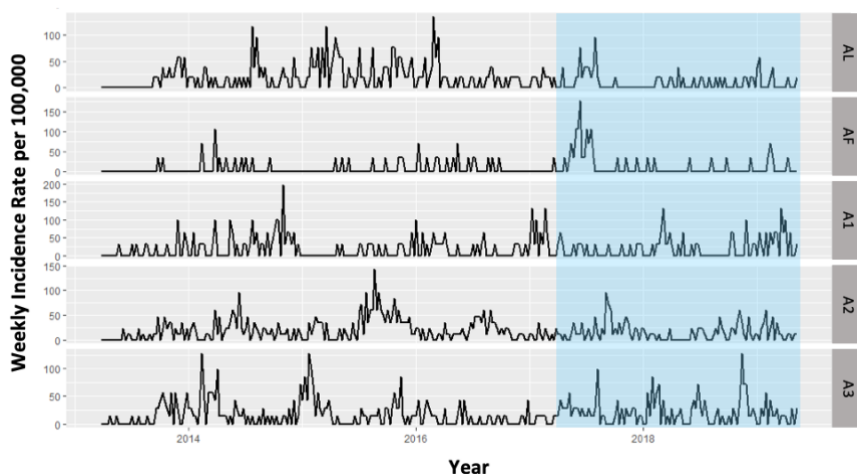

693  
694 **Fig. S7.** Dengue incidence plots at the Shah Alam Section 7 PKNS flats & Landed, Section 7  
695 Commercial Centre, and AU2 Landed / Flats release and matched control sites. SF, SL, SC,  
696 AL and AF represents release areas on different sites. See Table 1 for additional details on  
697 control sites. The periods during and after commencement of *Wolbachia* releases are  
698 indicated by blue regions.

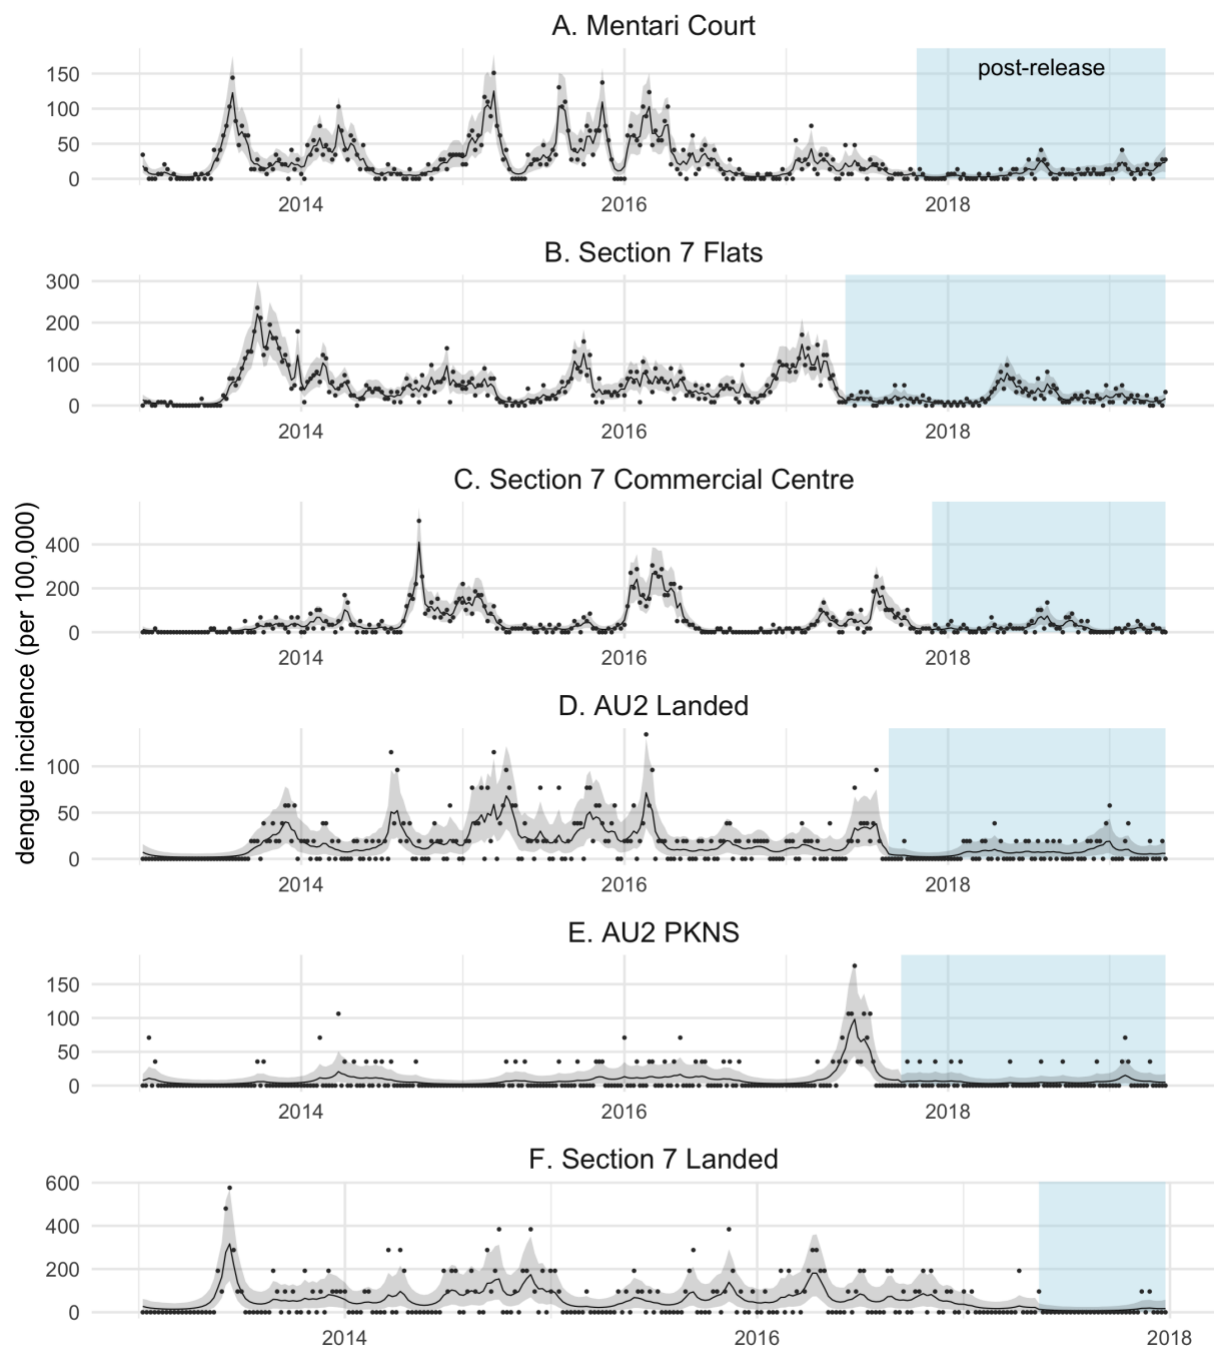

699  
700 **Fig. S8. Dengue reduction following *Wolbachia* releases.** Incidence of confirmed human  
701 dengue cases for each week of the study period in the release sites. Black lines and grey  
702 shaded areas show the posterior mean and 95% credible intervals of the incidence inferred  
703 from a Bayesian time series model. Points represent empirical incidences calculated directly  
704 from case data. The period during and after commencement of *Wolbachia*-carrying *Ae.*  
705 *aegypti* releases are indicated by blue regions.
